# Supplementary material
Source: PubMed Central journal article supplement (PMC8362588)
Supplement: NEJMoa2107051_disclosures.pdf [file NEJMoa2107051_disclosures.pdf]

**Disclosure Purpose:** 21-07051

### Summary of Interests

I do not have any interests to disclose at this time.

### Additional Questions:

- Are there other relationships or activities that readers could perceive to have influenced, or that give the appearance of potentially influencing, what you wrote in the submitted work?**  
No.
- What is the manuscript title?**  
Adjunct Immune Globulin for Vaccine-induced Thrombotic Thrombocytopenia
- Are you the corresponding author?**  
No.

### Certification

I certify that the information provided in this disclosure is complete and accurate.

**Disclosure Purpose:** 21-07051

**Summary of Interests**

I do not have any interests to disclose at this time.

**Additional Questions:**

- 1. **Are there other relationships or activities that readers could perceive to have influenced, or that give the appearance of potentially influencing, what you wrote in the submitted work?**  
No.
- 2. **What is the manuscript title?**  
Adjunct Immune Globulin for Vaccine-induced Thrombotic Thrombocytopenia
- 3. **Are you the corresponding author?**  
No.

**Certification**

I certify that the information provided in this disclosure is complete and accurate.

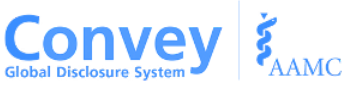

**Disclosure Purpose:** 21-07051

### Summary of Interests

I do not have any interests to disclose at this time.

### Additional Questions:

- Are there other relationships or activities that readers could perceive to have influenced, or that give the appearance of potentially influencing, what you wrote in the submitted work?**  
No.
- What is the manuscript title?**  
Adjunct Immune Globulin for Vaccine-induced Thrombotic Thrombocytopenia
- Are you the corresponding author?**  
No.

### Certification

I certify that the information provided in this disclosure is complete and accurate.

**Disclosure Purpose:** 21-07051

### Summary of Interests

I do not have any interests to disclose at this time.

### Additional Questions:

- Are there other relationships or activities that readers could perceive to have influenced, or that give the appearance of potentially influencing, what you wrote in the submitted work?**  
No.
- What is the manuscript title?**  
Adjunct Immune Globulin for Vaccine-induced Thrombotic Thrombocytopenia
- Are you the corresponding author?**  
No.

### Certification

I certify that the information provided in this disclosure is complete and accurate.

**Disclosure Purpose:** 21-07051

**Summary of Interests**

I do not have any interests to disclose at this time.

**Additional Questions:**

- Are there other relationships or activities that readers could perceive to have influenced, or that give the appearance of potentially influencing, what you wrote in the submitted work?**  
No.
- What is the manuscript title?**  
Adjunct immune globulin for vaccine-induced thrombotic thrombocytopenia
- Are you the corresponding author?**  
No.

**Certification**

I certify that the information provided in this disclosure is complete and accurate.

**Disclosure Purpose:** 21-07051

### Summary of Interests

I do not have any interests to disclose at this time.

### Additional Questions:

- Are there other relationships or activities that readers could perceive to have influenced, or that give the appearance of potentially influencing, what you wrote in the submitted work?**  
No.
- What is the manuscript title?**  
Adjunct Intravenous Immune Globulin for Vaccine-induced Immune Thrombotic Thrombocytopenia
- Are you the corresponding author?**  
No.

### Certification

I certify that the information provided in this disclosure is complete and accurate.

Disclosure Purpose: 21-07051

## Summary of Interests

### Company or Organization

| Entity                                                                                                                          | Type             | Interest Held By                                                               |
|---------------------------------------------------------------------------------------------------------------------------------|------------------|--------------------------------------------------------------------------------|
| <a href="#">Canadian Institutes of Health Research</a>                                                                          | Grant / Contract | Self                                                                           |
| <i>Recipient Name:</i> Ishac Nazy<br><i>Grant / Contract Description:</i> Grant number 438385<br><i>Additional Information:</i> |                  | <i>Recipient Type:</i> Individual<br><i>Grant / Contract Purpose:</i> Research |

## Additional Questions:

1. **Are there other relationships or activities that readers could perceive to have influenced, or that give the appearance of potentially influencing, what you wrote in the submitted work?**

No.

2. **What is the manuscript title?**

Adjunct Immune Globulin for Vaccine-induced Thrombotic Thrombocytopenia

3. **Are you the corresponding author?**

Yes.

a. **Please list the other authors' names here.**

Bourguignon, Alex; McMaster University, Medicine Arnold, Donald; McMaster University, Department of Medicine; Warkentin, Theodore; McMaster University, Department of Pathology & Molecular Medicine; Smith, James; McMaster University, Department of Medicine Pannu, Tania; University of Calgary Cumming School of Medicine, Department of Medicine: General Internal Medicine Shrum, Jeffrey; University of Calgary, Internal Medicine Al Maqrashi, Zainab Ali Amer; McMaster University Shroff, Anjali; McMaster University Lessard, Marie-Claude; Hôpital régional de Saint-Jérôme Blais, Normand; Centre Hospitalier de l'Université de Montreal Kelton, John; McMaster University Medical Centre, Faculty of Health Sciences; Nazy, Ishac; McMaster University, Medicine

## Certification

I certify that the information provided in this disclosure is complete and accurate.

**Disclosure Purpose:** 21-07051

Summary of Interests

I do not have any interests to disclose at this time.

Additional Questions:

- 1. **Are there other relationships or activities that readers could perceive to have influenced, or that give the appearance of potentially influencing, what you wrote in the submitted work?**  
No.
- 2. **What is the manuscript title?**  
Adjunct Immune Globulin for Vaccine-induced Thrombotic Thrombocytopenia
- 3. **Are you the corresponding author?**  
No.

Certification

I certify that the information provided in this disclosure is complete and accurate.

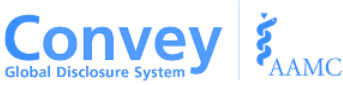



Disclosure Purpose: 21-07051

Summary of Interests

**Company or Organization**

| Entity                         | Type  | Interest Held By |
|--------------------------------|-------|------------------|
| Gilead Sciences                | Stock | Self             |
| <i>Additional Information:</i> |       |                  |

Additional Questions:

- Are there other relationships or activities that readers could perceive to have influenced, or that give the appearance of potentially influencing, what you wrote in the submitted work?**  
No.
- What is the manuscript title?**  
Adjunct immune globulin for vaccine-induced thrombotic thrombocytopenia
- Are you the corresponding author?**  
No.

Certification

I certify that the information provided in this disclosure is complete and accurate.

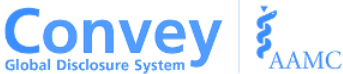

**Disclosure Purpose:** 21-07051

### Summary of Interests

I do not have any interests to disclose at this time.

### Additional Questions:

- Are there other relationships or activities that readers could perceive to have influenced, or that give the appearance of potentially influencing, what you wrote in the submitted work?**  
No.
- What is the manuscript title?**  
Adjunct Immune Globulin for Vaccine-induced Thrombotic Thrombocytopenia
- Are you the corresponding author?**  
No.

### Certification

I certify that the information provided in this disclosure is complete and accurate.

**Disclosure Purpose:** 21-07051

Summary of Interests

I do not have any interests to disclose at this time.

Additional Questions:

- 1. **Are there other relationships or activities that readers could perceive to have influenced, or that give the appearance of potentially influencing, what you wrote in the submitted work?**  
No.
- 2. **What is the manuscript title?**  
Adjunct Immune Globulin for Vaccine-induced Thrombotic Thrombocytopenia
- 3. **Are you the corresponding author?**  
No.

Certification

I certify that the information provided in this disclosure is complete and accurate.

Disclosure Purpose: 21-07051

## Summary of Interests

### Company or Organization

| Entity                                                                                                                                                                                      | Type                       | Interest Held By                                                                |
|---------------------------------------------------------------------------------------------------------------------------------------------------------------------------------------------|----------------------------|---------------------------------------------------------------------------------|
| Aspen Canada                                                                                                                                                                                | Consultant                 | Self                                                                            |
| <i>Category:</i> Consultant<br><i>Additional Information:</i> one-time consulting                                                                                                           |                            | <i>Description:</i> Consultant at meeting                                       |
| Aspen Global                                                                                                                                                                                | Consultant                 | Self                                                                            |
| <i>Category:</i> Consultant<br><i>Additional Information:</i> Generation of a report                                                                                                        |                            | <i>Description:</i> Preparation of a report                                     |
| Ergomed                                                                                                                                                                                     | End Point Review Committee | Self                                                                            |
| <i>Category:</i> End Point Review Committee<br><i>Additional Information:</i> study suspected (COVID-19 pandemic)                                                                           |                            | <i>Description:</i> End point committee                                         |
| Instrumentation Laboratory Company                                                                                                                                                          | Grant / Contract           | Other - McMaster University                                                     |
| <i>Recipient Name:</i> McMaster University<br><i>Grant / Contract Description:</i> Lab testing for HIT<br><i>Additional Information:</i> Research performed under direction of T. Warkentin |                            | <i>Recipient Type:</i> Institution<br><i>Grant / Contract Purpose:</i> Research |
| Instrumentation Laboratory Company                                                                                                                                                          | Consultant                 | Self                                                                            |
| <i>Category:</i> Consultant<br><i>Additional Information:</i> ad board plus general consulting                                                                                              |                            | <i>Description:</i> Ad board                                                    |

### Additional Questions:

- Are there other relationships or activities that readers could perceive to have influenced, or that give the appearance of potentially influencing, what you wrote in the submitted work?  
No.
- What is the manuscript title?  
Adjunct immune globulin for vaccine-induced thrombotic thrombocytopenia.
- Are you the corresponding author?  
No.

### Certification

I certify that the information provided in this disclosure is complete and accurate.
